# Supplementary material for: A New Cerkl Mouse Model Generated by CRISPR-Cas9 Shows Progressive Retinal Degeneration and Altered Morphological and Electrophysiological Phenotype
Source: PubMed Central journal article supplement — Invest Ophthalmol Vis Sci. 2020 Jul 13;61(8):14. doi: 10.1167/iovs.61.8.14 (PMC7425692; doi:10.1167/iovs.61.8.14), 2020-07-13
Supplement: iovs-61-8-14_s001.pdf [file iovs-61-8-14_s001.pdf]

**Supplementary table 1. List of primers used for testing gene editing in potential off-target regions.**

| <b>Name</b>            | <b>Primers (5'→3')</b>   | <b>Region</b> |
|------------------------|--------------------------|---------------|
| <i>Cerkl</i> 53 DR274F | taggCCTTATATGAGGGGGTGGTC | 5'            |
| <i>Cerkl</i> 53 pX330F | caccCCTTATATGAGGGGGTGGTC | 5'            |
| <i>Cerkl</i> 53 R      | aaacGACCACCCCCTCATATAAGG | 5'            |
| <i>Cerkl</i> 54 DR274F | taggCCTGACCACCCCCTCATATA | 5'            |
| <i>Cerkl</i> 54 pX330F | caccCCTGACCACCCCCTCATATA | 5'            |
| <i>Cerkl</i> 54 R      | aaacTATATGAGGGGGTGGTCAGG | 5'            |
| <i>Cerkl</i> 33 DR274F | taggATCTTCTGCTTGGGCTTAGG | 3'            |
| <i>Cerkl</i> 33 pX330F | caccATCTTCTGCTTGGGCTTAGG | 3'            |
| <i>Cerkl</i> 33R       | aaacCCTAAGCCCAAGCAGAAGAT | 3'            |
| <i>Cerkl</i> 34 DR274F | taggACAAACCTGAGCATTATGC  | 3'            |
| <i>Cerkl</i> 34 pX330F | caccACAAACCTGAGCATTATGC  | 3'            |
| <i>Cerkl</i> 34R       | aaacGCATAAATGCTCAGGTTTGT | 3'            |

**Supplementary Table 2. List of reported *CERKL* mutations in human patients, classified by their molecular effect, indicating the nucleotide and amino acid change, if reported in homo- or hetero-zygosis, and the associated clinical retinal phenotype (references at the end).**

| <b><i>CERKL</i> non-synonymous mutations (non-sense and missense)</b> |                          |                         |                                         |                          |
|-----------------------------------------------------------------------|--------------------------|-------------------------|-----------------------------------------|--------------------------|
| <b>Mutation</b>                                                       | <b>Localization</b>      | <b>Aminoacid change</b> | <b>Zygosis</b>                          | <b>Retinal dystrophy</b> |
| GAG-TAG                                                               | c.193G>T                 | p.E65*                  | HM <sup>[1]</sup><br>HT <sup>[2]</sup>  | RCD, MD                  |
| CGT-TGT                                                               | c.316C>T                 | p.R106C                 | HT <sup>[1]</sup>                       | arRP                     |
| CGT-AGT                                                               | c.316C>A                 | p.R106S                 | HM <sup>[3]</sup>                       | arRP                     |
| GGT-GAT                                                               | c.356G>A                 | p.G119D                 | HT <sup>[4]</sup>                       | CRD                      |
| CTC-CGC                                                               | c.365T>G                 | p.L122R                 | HM <sup>[5]</sup>                       | RP                       |
| TGC-TGG                                                               | c.375C>G                 | p.C125W                 | HM <sup>[6]</sup>                       | CRD                      |
| CTA-CCA                                                               | c.398T>C                 | p.L133P                 | HT <sup>[7]</sup>                       | RP                       |
| TGG-GGG                                                               | c.451T>G                 | p.W151G                 | HT <sup>[8]</sup>                       | RD                       |
| CCG-CTG                                                               | c.497C>T                 | p.P166L                 | HT <sup>[9]</sup>                       | MD                       |
| AAA-TAA                                                               | c.598A>T                 | p.K200*                 | HT <sup>[10]</sup>                      | RP                       |
| CAG-TAG                                                               | c.664C>T                 | p.Q222*                 | HT <sup>[11]</sup>                      | arRP                     |
| GAT-GTT                                                               | c.674A>T                 | p.D225V                 | HT <sup>[12]</sup>                      | RP                       |
| GGA-AGA                                                               | c.772G>A                 | p.G258R                 | HT <sup>[13]</sup>                      | CRD                      |
| CTG-CCG                                                               | c.812T>C                 | p.L271P                 | HM <sup>[14]</sup>                      | RP                       |
| CGA-TGA                                                               | c.847C>T                 | p.R283*                 | HM <sup>[15]</sup><br>HT <sup>[2]</sup> | RP, CRD                  |
| ATA-ACA                                                               | c.890T>C                 | p.I297T                 | HM <sup>[16]</sup>                      | RP, RCD                  |
| TGC-TGA                                                               | c.999C>A                 | p.C333*                 | HM <sup>[17]</sup>                      | CRD                      |
| CGA-TGA                                                               | c.1090C>T                | p.R364*                 | HM <sup>[18]</sup>                      | CD, CRD                  |
| TGT-TGA                                                               | c.1164T>A                | p.C388*                 | HT <sup>[19]</sup>                      | RD                       |
| CAG-TAG                                                               | c.1270C>T                | p.Q424*                 | HM <sup>[20]</sup>                      | RP                       |
| CGA-TGA                                                               | c.1381C>T                | p.R461*                 | HT <sup>[21]</sup>                      | RP                       |
| AGC-TGC                                                               | c.1651A>T                | p.S551C                 | HT <sup>[22]</sup>                      | MD, CD,<br>CRD           |
| <b><i>CERKL</i> splicing mutations</b>                                |                          |                         |                                         |                          |
| <b>Mutation</b>                                                       | <b>Localization</b>      | <b>Zygosis</b>          | <b>Retinal dystrophy</b>                |                          |
| IVS1 ds G-A +1                                                        | c.238+1G>A               | HM <sup>[23]</sup>      | RD                                      |                          |
| IVS2 ds T-G +2                                                        | c.481+2T>G               | HM <sup>[20]</sup>      | CRD                                     |                          |
| IVS9 as T-A -3                                                        | c.1212-3T>A              | HT <sup>[24]</sup>      | RP                                      |                          |
| IVS11 as C-G -3                                                       | c.1347-3C>G              | HT <sup>[25]</sup>      | RD                                      |                          |
| IVS1 ds T-C +2                                                        | c.238+2T>C               | HT <sup>[26]</sup>      | RP, CRD                                 |                          |
| <b>Small <i>CERKL</i> deletions</b>                                   |                          |                         |                                         |                          |
| <b>Mutation</b>                                                       | <b>Localization</b>      | <b>Aminoacid change</b> | <b>Zygosis</b>                          | <b>Retinal dystrophy</b> |
| CACTT <sup>^</sup> 139<br>GATCTtATTAATTTAA                            | c.420delT                | p.(Ile141<br>Leufs*3)   | HT <sup>[10]</sup>                      | RP                       |
| ACTGT <sup>^</sup> 149<br>GACATatGGTTTtagACA                          | c.450_451 delAT          | p.(Ile150<br>Metfs*3)   | HM <sup>[27]</sup>                      | CRD                      |
| GTA <sup>^</sup> 204ACAA_EI_<br>GTAagTAATTTTCAG                       | c.613+4_613+5<br>delIAG  |                         | HT <sup>[25]</sup>                      | RP                       |
| TA <sup>^</sup> 204ACAA_EI_<br>GTAAgtaaTTTTcAGAAT                     | c.613+5_613+8<br>delGTAA |                         | HM <sup>[28]</sup>                      | RP                       |

|                                      |                            |                             |                              |                              |
|--------------------------------------|----------------------------|-----------------------------|------------------------------|------------------------------|
| TTTTCTAG_IE_<br>TGtT^254GTCTGTGTT    | c.759delT                  | p.(Val254<br>Serfs*12)      | HT <sup>[29]</sup>           | RD                           |
| AATGCT^278<br>GGGAtGGAAACAGAC        | c.836delT                  | p.(Met279<br>Argfs*7)       | HT <sup>[30]</sup>           | RP                           |
| GAATC^285<br>CTGACtCCTGTTCAGAG       | c.858delT                  | p.(Pro287<br>Leufs*10)      | HT <sup>[10]</sup>           | RP                           |
| ATTGCAC^322<br>ATTatAATGG_EI_GTAAG   | c.968_969delTA             | p.(Ile323<br>Asnfs*46)      | HM <sup>[31]</sup>           |                              |
| GTTCTCA^34<br>8GCCatGTTTGGCTTT       | c.1045_1046<br>delAT       | p.(Met349<br>Valfs*20)      | HM <sup>[2]</sup>            | RD                           |
| AAA^383CTTAA_EI_<br>GTaagtCTTTTTCTTA | c.1151+3_1151+6<br>delAAGT |                             | HM <sup>[25]</sup>           | RP                           |
| GCAGAA^387<br>GACTgtGAAATATCAT       | c.1164_1165<br>delTG       | p.(Cys388*)                 | HT <sup>[32]</sup>           |                              |
| CTGTT^493<br>GAGGAaGTAAGGTTTC        | c.1482delA                 | p.(Val495*)                 | HM <sup>[33]</sup>           | RD                           |
| <b>Small CERKL insertions</b>        |                            |                             |                              |                              |
| <b>Mutation</b>                      | <b>Localization</b>        | <b>Aminoacid<br/>change</b> | <b>Zygonis</b>               | <b>Retinal<br/>dystrophy</b> |
| GGGCATC^52<br>TTctGAGATCGGGA         | c.156_157insT              | p.(Glu53*)                  | HM <sup>[30]</sup>           | RP                           |
| GCGAG^66CGAGC<br>gagcACTGCGGTGG      | c.197_200dup<br>GAGC       | p.(Leu68<br>Serfs*15)       | HT <sup>[24]</sup>           | MD, CD,<br>CRD               |
| TGAGACT^490<br>TACttacACTGTTGAGG     | c.1467_1470<br>dupTTAC     | p.(Thr491<br>Leufs*4)       | HM <sup>[34]</sup>           | RP                           |
| ATCAGT^547<br>CTTTctttATGGAGGAAG     | c.1639_1642<br>dupCTTT     | p.(Tyr548<br>Serfs*19)      | HT <sup>[7]</sup>            | RP                           |
| <b>Large CERKL deletions</b>         |                            |                             |                              |                              |
| <b>Mutation</b>                      | <b>Localization</b>        | <b>Zygonis</b>              | <b>Retinal<br/>dystrophy</b> |                              |
| gDNA                                 | Exon 1-2                   | HT <sup>[35]</sup>          | RD                           |                              |
| gDNA                                 | Exon 2                     | HT <sup>[24]</sup>          | RP                           |                              |
| gDNA                                 | Exon 2                     | HT <sup>[25]</sup>          | MD, CD,<br>CRD               |                              |
| gDNA                                 | Exon 1                     | HT <sup>[26]</sup>          | RP, CRD                      |                              |
| gDNA                                 | Exon 2                     | HT <sup>[26]</sup>          | RP, CRD                      |                              |

**ar**: Autosomic recessive. **HM**: Homozygosis. **HT**: Heterozygosis. **RD**: Retinal Dystrophy. **RP**: Retinitis Pigmentosa. **CD**: Cone Dystrophy. **CRD**: Cone-Rod Dystrophy. **MD**: Macular degeneration.

(Mutations listed on *Human Gene Mutation Database* (HGMD) <http://www.hgmd.cf.ac.uk/ac/index.php>).

## REFERENCES

- [1] K. Avela, E. M. Sankila, S. Seitsonen, *et al.*, "A founder mutation in CERKL is a major cause of retinal dystrophy in Finland," *Acta Ophthalmol.*, 2018, vol. 96, no. 2, pp. 183–191.
- [2] J. M. Ellingford, S. Barton, S. Bashkar, *et al.*, "Molecular findings from 537 individuals with inherited retinal disease," *J. Med. Genet.*, 2016, vol. 53, no. 11, pp. 761–767.
- [3] M. Ali, V. L. Ramprasad, N. Soumitra, *et al.*, "A missense mutation in the nuclear localization signal sequence of CERKL ( p . R106S ) causes autosomal recessive retinal degeneration," *Mol. Vis.* 2008, vol. 14, pp. 1960–1964.
- [4] M. Ezquerro-Inchausti, A. Anasagasti, O. Barandika, *et al.*, "A new approach based on targeted pooled DNA sequencing identifies novel mutations in patients with Inherited Retinal Dystrophies," *Sci. Rep.*, 2018, vol. 8, no. 1, pp. 1–12.
- [5] L. Roberts, R. Ratnapriya, V. Chaitankar, *et al.*, "Molecular Diagnosis of Inherited Retinal Diseases in Indigenous African Populations by Whole-Exome Sequencing." *Investig. Ophthalmol. Vis. Sci.*, 2016, vol. 57, no. 14, pp. 6374–6381.
- [6] K. W. Littink, R.K. Koenekoop, L.I. van den Born, *et al.*, "Homozygosity mapping in patients with cone-rod dystrophy: Novel mutations and clinical characterizations", *Investig. Ophthalmol. Vis. Sci.*, 2010, vol. 51, no. 11, pp. 5943–5951.
- [7] Y. Xu, L. Guan, T. Shen *et al.*, "Mutations of 60 known causative genes in 157 families with retinitis pigmentosa based on exome sequencing.," *Hum. Genet.*, 2014, vol. 133, no. 10, pp. 1255–1271.
- [8] X. F. Huang, F. Huang, K. Wu, *et al.*, "Genotype-phenotype correlation and mutation spectrum in a large cohort of patients with inherited retinal dystrophy revealed by next-generation sequencing," *Genet. Med.*, 2015, vol. 17, no. 4, pp. 271–278.
- [9] P. Wang, S. Li, W. Sun, *et al.*, "An ophthalmic targeted exome sequencing panel as a powerful tool to identify causative mutations in patients suspected of hereditary eye diseases," *Transl. Vis. Sci. Technol.*, 2019, vol. 8, no. 2, pp. 21.

- [10] K. M. Nishiguchi, R. G. Tearle, Y. P. Liu, *et al.*, “Whole genome sequencing in patients with retinitis pigmentosa reveals pathogenic DNA structural changes and NEK2 as a new disease gene,” *Proc. Natl. Acad. Sci. U. S. A.*, 2013, vol. 110, no. 40, pp. 16139–16144.
- [11] R. Perez-Carro, M. Corton, I. Sánchez-Navarro, *et al.*, “Panel-based NGS Reveals Novel Pathogenic Mutations in Autosomal Recessive Retinitis Pigmentosa,” *Sci. Rep.*, 2016, vol. 6, no. 19531.
- [12] S. Kantarci, J. L. Deignan, N. Dorrani, *et al.*, “Clinical Exome Sequencing for Genetic Identification of Rare Mendelian Disorders,” *JAMA*, 2014, vol. 312, no. 18, pp. 1880–1887.
- [13] C. Jespersgaard, M. Fang, M. Bertelsen, *et al.*, “Molecular genetic analysis using targeted NGS analysis of 677 individuals with retinal dystrophy,” *Sci. Rep.*, 2019, vol. 9, no. 1, pp. 1–7.
- [14] J. Wang, V. W. Zhang, Y. Feng, *et al.*, “Dependable and efficient clinical utility of target capture-based deep sequencing in molecular diagnosis of retinitis pigmentosa,” *Investig. Ophthalmol. Vis. Sci.*, 2014, vol. 55, no. 10, pp. 6213–6223.
- [15] M. Tuson, G. Marfany, and R. González, “Mutation of CERKL, a Novel Human Ceramide Kinase Gene, Causes Autosomal Recessive Retinitis Pigmentosa (RP26),” *Am. J. Hum. Genet.*, 2004, vol. 74, no. 1, pp. 128–138.
- [16] N. Patel, N. A. Aldahmesh, H. Alkuraya, *et al.*, “Expanding the clinical, allelic, and locus heterogeneity of retinal dystrophies,” *Genet. Med.*, 2016, vol. 18, no. 6, pp. 554–562.
- [17] A. O. Khan and L. Abu-Safieh, “Rod-Cone Dystrophy with Initially Preserved Visual Acuity Despite Early Macular Involvement Suggests Recessive CERKL Mutations,” *Ophthalmic Genet.*, 2015, vol. 36, no. 4, pp. 369–372.
- [18] E. Boulanger-Scemama, S. El Shamieh, V. Démontant, *et al.*, “Next-generation sequencing applied to a large French cone and cone-rod dystrophy cohort: Mutation spectrum and new genotype-phenotype correlation,” *Orphanet J. Rare Dis.*, 2015, vol. 10, no. 1.
- [19] R. Matsui, A. V. Cideciyan, S. B. Schwartz, *et al.*, “Molecular heterogeneity within the clinical diagnosis of pericentral retinal degeneration,” *Investig. Ophthalmol. Vis. Sci.*, 2015, vol. 56, no. 10, pp. 6007–6018.
- [20] N. Glöckle, S. Kohl, J. Mohr, *et al.*, “Panel-based next generation sequencing as

a reliable and efficient technique to detect mutations in unselected patients with retinal dystrophies," *Eur J Hum Genet.*, 2014, vol. 22, no. 1, pp. 99–104.

- [21] E. M. Stone, J. L. Androf, S. S. Whitmore, *et al.*, "Clinically Focused Molecular Investigation of 1000 Consecutive Families with Inherited Retinal Disease," *Ophthalmology.*, 2017, vol. 124, no. 9, pp. 1314-1331.
- [22] J. Birtel, T. Eisenberger, M. Gliem, *et al.*, "Clinical and genetic characteristics of 251 consecutive patients with macular and cone/cone-rod dystrophy," *Sci. Rep.*, 2018, vol. 8, no. 1, pp. 1–11.
- [23] N. Auslender, D. Sharon, A. H. Abbasi, *et al.*, "A common founder mutation of CERKL underlies autosomal recessive retinal degeneration with early macular involvement among Yemenite Jews," *Investig. Ophthalmol. Vis. Sci.*, 2007, vol. 48, no. 12, pp. 5431–5438.
- [24] J. Birtel, M. Gliem, E. Mangold *et al.*, "Next-generation sequencing identifies unexpected genotype-phenotype correlations in patients with retinitis pigmentosa," *PLoS One*, 2018, vol. 13, no. 12, pp. 1–18.
- [25] K. Carss, G. Arno, M. Erwood, *et al.*, "Comprehensive Rare Variant Analysis via Whole-Genome Sequencing to Determine the Molecular Pathology of Inherited Retinal Disease," *Am. J. Hum. Genet.*, 2017, vol. 100, no. 1, pp. 75–90.
- [26] J. M. Ellingford, B. Horn, C. Campbell, *et al.*, "Assessment of the incorporation of CNV surveillance into gene panel next-generation sequencing testing for inherited retinal diseases," *J. Med. Genet.*, 2018, vol. 55, no. 2, pp. 114–121.
- [27] B. Azab, R. Barham, D. Ali, *et al.*, "Novel CERKL variant in consanguineous Jordanian pedigrees with inherited retinal dystrophies," *Cananian J. Ophthalmol.*, 2019, vol. 54, no. 1, pp. 51–59.
- [28] M. De Castro-Miró, R. Tonda, P. Escudero-Ferruz, *et al.*, "Novel candidate genes and a wide spectrum of structural and point mutations responsible for inherited retinal dystrophies revealed by exome sequencing," *PLoS One*, 2016, vol. 11, no. 12, pp. 1–19.
- [29] X. Huang, F. Huang, K. Wu, *et al.*, "Open Genotype – phenotype correlation and mutation spectrum in a large cohort of patients with inherited retinal dystrophy revealed by next-generation sequencing," *Genetics in Medicine*, 2015, vol. 17, no. 4, pp. 271–278.
- [30] Z. Tang, Z. Wang, Z. Wang, *et al.*, "Novel Compound Heterozygous Mutations in

CERKL Cause Autosomal Recessive Retinitis Pigmentosa in a Nonconsanguineous Chinese Family,” *Arch Ophthalmol*, 2009, vol. 127, no. 8, pp. 1077.

- [31] P. Biswas, J. L. Duncan, B. Maranhao, *et al.*, “Genetic analysis of 10 pedigrees with inherited retinal degeneration by exome sequencing and phenotype-genotype association,” *Physiol. Genomica.*, 2017, vol. 49, pp. 216–229.
- [32] T. S. Aleman, N. Soumitra, A. V. Cideciyan, *et al.*, “CERKL mutations cause an autosomal recessive cone-rod dystrophy with inner retinopathy,” *Investig. Ophthalmol. Vis. Sci.*, 2009, vol. 50, no. 12, pp. 5944–5954.
- [33] Q. Fu, F. Wang, H. Wang, *et al.*, “Next-Generation sequencing-based molecular diagnosis of a Chinese patient cohort with autosomal recessive retinitis pigmentosa,” *Investig. Ophthalmol. Vis. Sci.*, 2013, vol. 54, no. 6, pp. 4158–4166.
- [34] L. Wang, J. Zhang, N. Chen, *et al.*, “Application of whole exome and targeted panel sequencing in the clinical molecular diagnosis of 319 Chinese families with inherited retinal dystrophy and comparison study,” *Genes.*, 2018, vol. 9, no. 7, pp. 1–11.
- [35] J. M. Ellingford, C. Campbel, S. Barton, *et al.*, “Validation of copy number variation analysis for next-generation sequencing diagnostics,” *Eur. J. Hum. Genet.*, 2017, vol. 25, no. 6, pp. 719–724.

**A**

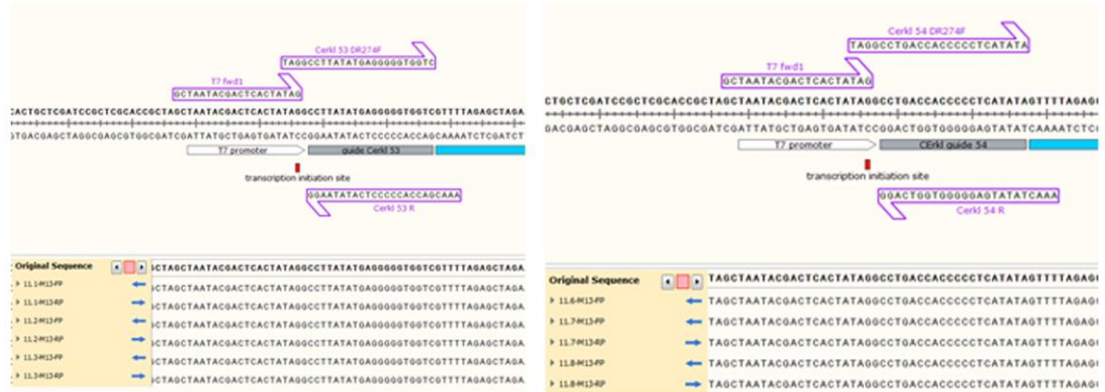

**B**

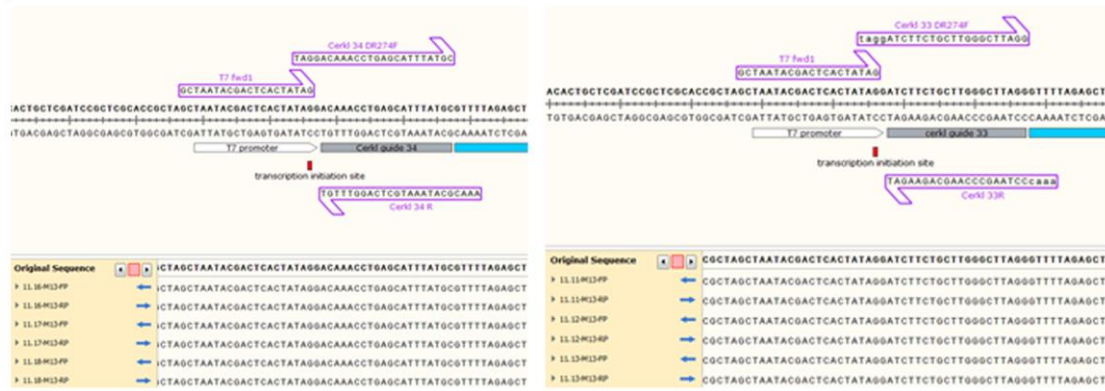

**Figure S1. CRISPR/Cas9 guide position.** To perform *Cerkl* gene edition we used four guides, two guides at 5' (**A**), and two guides at 3' (**B**).



## A) Whole region

PCR whole deletion (Primers: Cerkl UF – Cerkl DR)

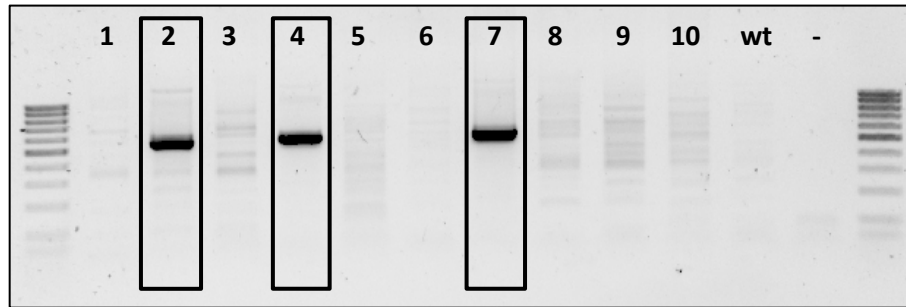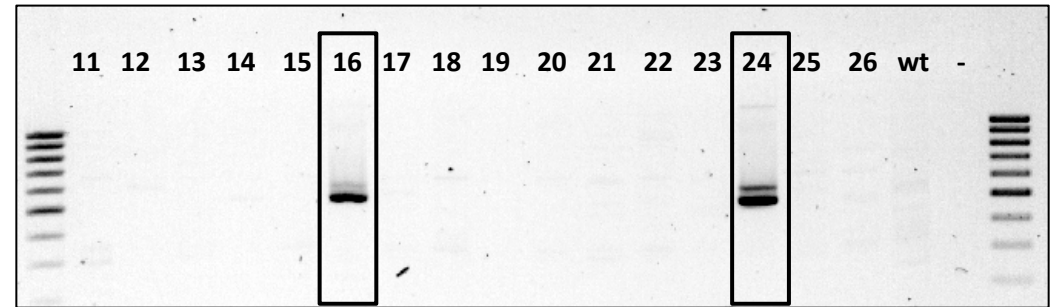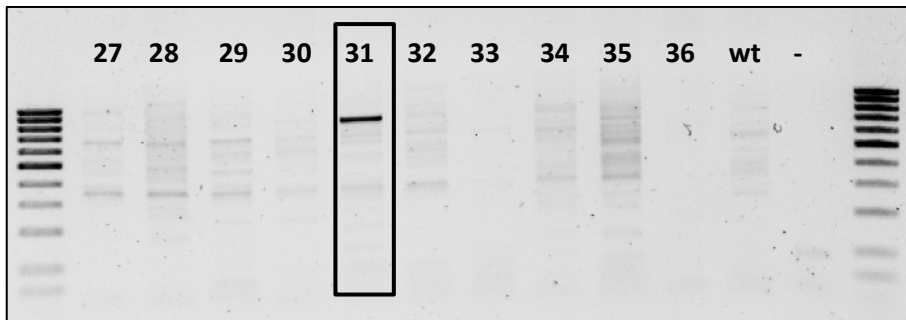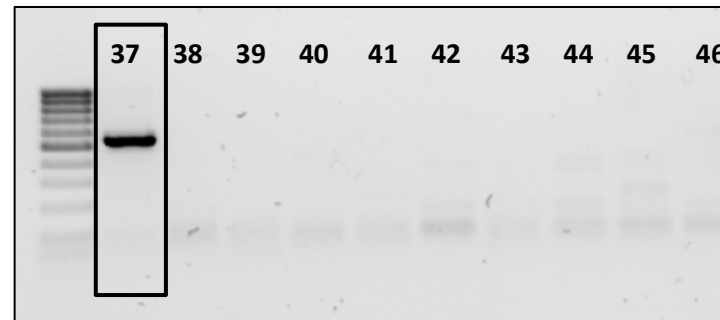

(guides underlined) (small insertions) (small deletions)

|          |                                                                                                                                     |                                |
|----------|-------------------------------------------------------------------------------------------------------------------------------------|--------------------------------|
| wt 5'    | tagtacagaaaccccagttttaaatcacccttcaatgcctgaccaccccctcatataaggacttcacaaa                                                              |                                |
| wt 3'    | GGCGTTCTGCCTCCTAAGCCCAAGCAGAAGATTAAAAGCCAGAAAGTTAGCACATTGTATAAATACATATGCACCACCTCTCAATAAATACAAACCTGAGCATTATGCTGGCATTGCAAACATTATTTTGT |                                |
| mouse 02 | tagtacagaaaccccagttttaaatcacccttcaatgcctgaccaccccctcat...                                                                           | ...TGCAAACATTATTTTGT           |
| mouse 04 | tagtacagaaaccccagttttaaatcacccttcaatgcctgaccaccccctcat <del>tc</del> at...                                                          | ...TGCTGGCATTGCAAACATTATTTTGT  |
| mouse 07 | tagtacagaaaccccagttttaaatcacccttcaatgcctgaccaccccctca <del>ca</del> atgctcaggtttgtatttata...                                        | ...ATGCTGGCATTGCAAACATTATTTTGT |
| mouse 16 | tagtacagaaaccccagttttaaatcacccttcaatgcctgaccaccccctcagggac...                                                                       | ...TGCTGGCATTGCAAACATTATTTTGT  |
| mouse 24 | tagtacagaaaccccagttttaaatcacccttcaatgcctgaccaccccctc...                                                                             | ...AAACATTATTTTGT              |
| mouse 37 | tagtacagaaaccccagttttaaatcacccttcaatgcctgaccaccccctc...                                                                             | ...ATTATTTTGT                  |

## B) 5' or upstream region

PCR 5' or upstream (Primers: Cerkl UF2 – Cerkl UR)

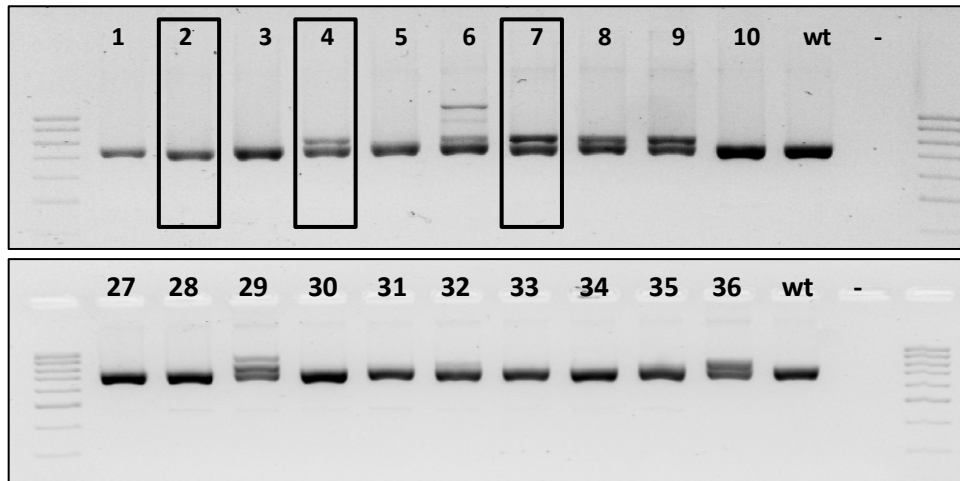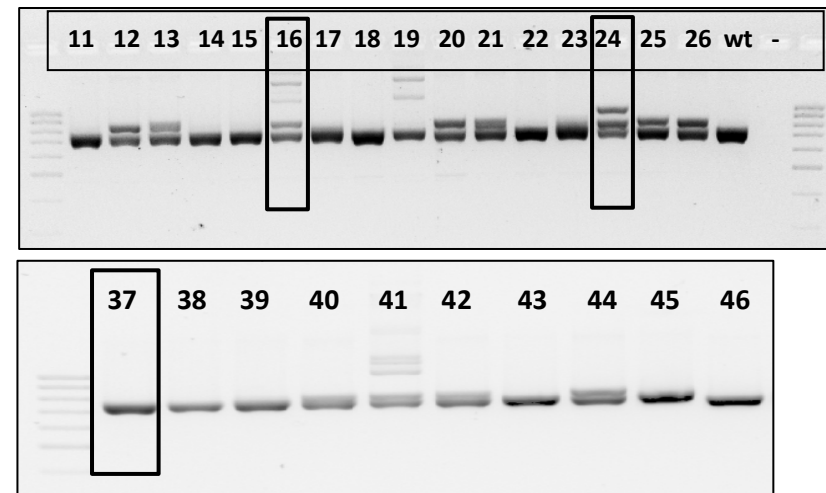

wt 5' tagtacagaaaccccagttttaaatcacccctcaatgcctgaccaccccctcatataaggacttcacaaa

mouse 02 (11/11) tagtacagaaaccccagttttaaatcacccctcaatgcctgaccaccccctca-----caaa

mouse 04a (10/12) tagtacagaaaccccagttttaaatcacccctcaatgcctgaccaccccctcataataaggacttcacaaa

mouse 04b (2/12) tagtacagaaaccccagttttaaatcacccctcaatgcctgaccaccccctca-----aaa

mouse 07 (6/12) tagtacagaaaccccagttttaaatcacccctcaatgcctgaccaccccctca-----caaa

mouse 16a (5/10) tagtacagaaaccccagttttaaatcacccctcaatgcctgacc-----ccctcatataaggacttcacaaa

mouse 16b (4/10) tagtacagaaaccccagttttaaatcacccctcaatgcctgaccaccccctc-----ttcacaaa

mouse 16c (1/10) tagtacagaaaccccagttttaaatcacccctcaatgcc-----cgaccccctcatataaggacttcacaaa

mouse 24a (3/14) tagtacagaaaccccagttttaaatcacccctcaatgcagaggtggtgcataatgtattatatacaatgtgctaactttctggttttaattctctgcttgggcattgaaggacttcacaaa

mouse 24b (9/14) tagtacagaaaccccagttttaaatcacccctcaatgcctgaccac-----taaggacttcacaaa

mouse 24c (2/14) tagtacagaaaccccagttttaaatcacccctcaatgcctgaccaccccctcataataaggacttcacaaa

mouse 37 (1/12) tagtacagaaaccccagttttaaatcacccctcaatgcctgaccaccccctcatataaggacttcacaaa

### C) 3' or downstream region (mice 7 & 37 wild type)

PCR 3' or downstream (Primers: Cerkl DF – Cerkl DR)

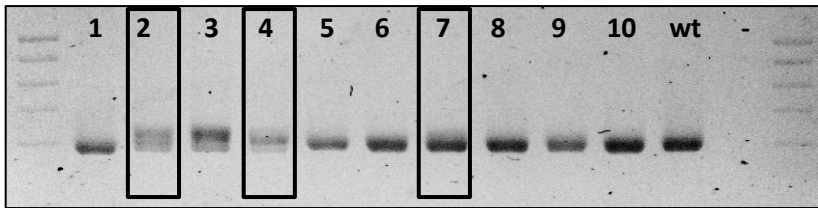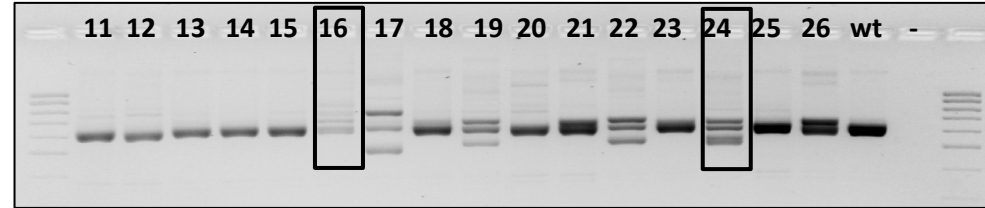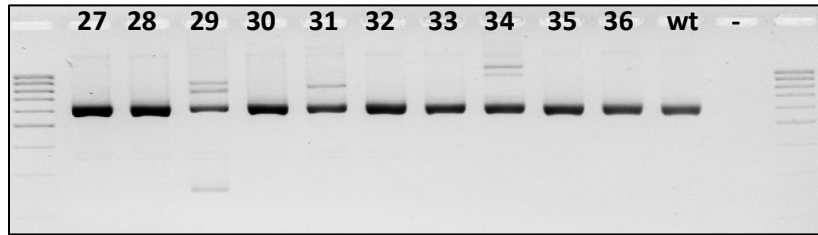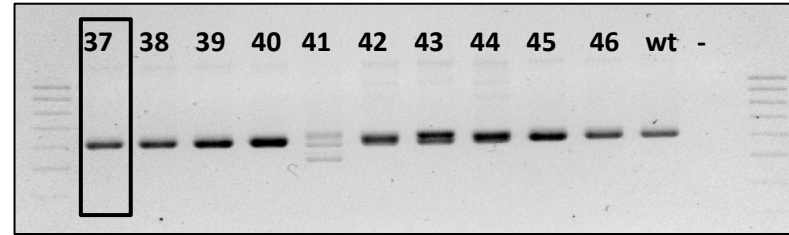

wt 3' GGC GTTCTGCCTCCTAAGCCCAAGCAGAAGATTAAAAGCCAGAAAGTTAGCACATTGTATAAATACATATGCACCACCTCTCAATAAATACAAACCTGAGCATTATGCTGGCATTGCAAACATTATTTTGT

mouse 02a (7/11) GGC GTTCTGCCTCCTAAGCCCAAGCAGAAGATTAAAAGCCAGAAAGTTAGCACATTGTATAAATACATATGCACCACCTCTCAATAAATACAAACCTGAGCATTATGCTGGCATTGCAAACATTATTTTGT

mouse 02b (4/11) GGC GTTCTGCCTCCTAAGCCCAAGCAGAAGATTAAAAGCCAGAAAGTTAGCACATTGTATAAATACATATGCACCACCTCTCAATAAAT-----GCTGGCATTGCAAACATTATTTTGT

mouse 04 (6/9) GGC GTTCTGCCTCC-AAGCCCAAGCAGAAGATTAAAAGCCAGAAAGTTAGCACATTGTATAAATACATATGCACCACCTCTCAATAAATACAAACCTGA-----GCATTGCAAACATTATTTTGT

mouse 16a (2/9) GCGTTCTGCCTC-----AAGCAGAAGATTAAAAGCCAGAAAGTTAGCACATTGTATAAATACATATGCACCACCTCTCAATAAATACAAACCTG-----GCATTGCAAACATTATTTTGT

mouse 24a (3/8) GGC GTTCTGC-----TGCCATTGCAAACATTATTTTGT

mouse 24b (3/8) GGC GTTCTGC-----AACATTATTTTGT

mouse 24c (2/8) GGC GTTCTGCCT-----GCCCAAGCAGAAGATTAAAAGCCAGAAAGTTAGCACATTGTATAAATACATATGCACCACCTCTCAATAAATACAAACCTG-----CTGGCATTGCAAACATTATTTTGT

wt (16b reference)

GAAAACCTGGGGCTATCTGGTTAAAGTTTCAAAGCTATAAAGATGTCAGAATGATGATGAAACTTAATTTCTAATAGGGGCCACCATGAAGCATCATGCTTTTTTTTTGTTTTTTTTTTTTTTTTTTTTTTTTTTTGTATATTTAGTTCAATTTCCCTTTGTG  
 GAGACTTATATCATTGAAGAAGTAAAAATTCACCCAAAGAGTAATAGCAATGGATACAGCCACAGGAGGAGGGTGGAAACCATACACTGCTTCAGAACACGGGTTCCCGTGGAATGTAGATGGTGACTTAATGGAAGCTGCATCAGAGGTTACATTA  
 GGTAAGCCCAACTATTTTATGACTTTCTGTGCAGAATACTAGATGCAACACTATTAATATAATAAGGGCGTTCTGCCTCCTAAGCCCAAGCAGAAGATTAAAAGCCAGAAAGTTAGCACATTGTATAAATACATATGCACCACCTCTCAATAAATACAAA  
 CCTGAGCATTATGCTGGCATTGCAAACATTATTTTGTATAAATGATACAGACATGTTGACAATTTACATTGTTTGTCTTTGAGGATATTTCTAAACCTTATAAGGTTAATGTAGTGCCATACTCTCTAGCCCTGCTCC

mouse 16b (7/9)

GAAAACCTGGGGCTATCTGGTTAAAGTTTCAAAGCTATAAAGATGTCAGAATGATGATGAAACTTAATTTCTAATAGGGGCCACCATGAAGCATC-----CTTTTGTGAA  
 GCTGGCATTGCAAACATTATTTTGTATAAATGATACAGACATGTTGACAATTTACATTGTTTGTCTTTGAGGATATTTCTAAACCTTATAAGGTTAATGTAGTGCCATACTCTCTAGCCCTGCTCCCA

**Figure S2. Genotyping PCRs for CRISPR-edited alleles in mosaic pups, and sequences gene-edited alleles per mice. A)** Specific PCRs for the whole *Cerkl* locus deletion allele with primers flanking the PAM sites for the Cas9 D10A nickase at 5' and 3' sequences, allowed to detect the pups (out of 46 born alive) carrying the full locus deletion. **B)** Specific primers for gene-editing in the upstream *Cerkl* region allowed to detect mosaic pups carrying alleles where Cas9 D10A nickase only cut at the 5' sites. **C)** Specific primers for gene-editing in the downstream *Cerkl* region allowed to detect mosaic pups carrying alleles where Cas9 D10A nickase only cut at the 3' sites. Per each specific primer pair, PCRs from animals carrying gene-edited alleles are highlighted. Bands were excised, cloned and sequenced. Very few alleles were present per animal (indicated by a and b sequences) and sequences are indicated below. Small indels at the edited sites were detected in some cases (blue nucleotides indicate small insertions and red nucleotides, small deletions). Mouse 16 b allele (gene-editing occurred only at the 3' *Cerkl* region carried a relatively larger deletion). Mouse 2 carrying the full locus deletion was chosen as a founder for our colony (highlighted in yellow).

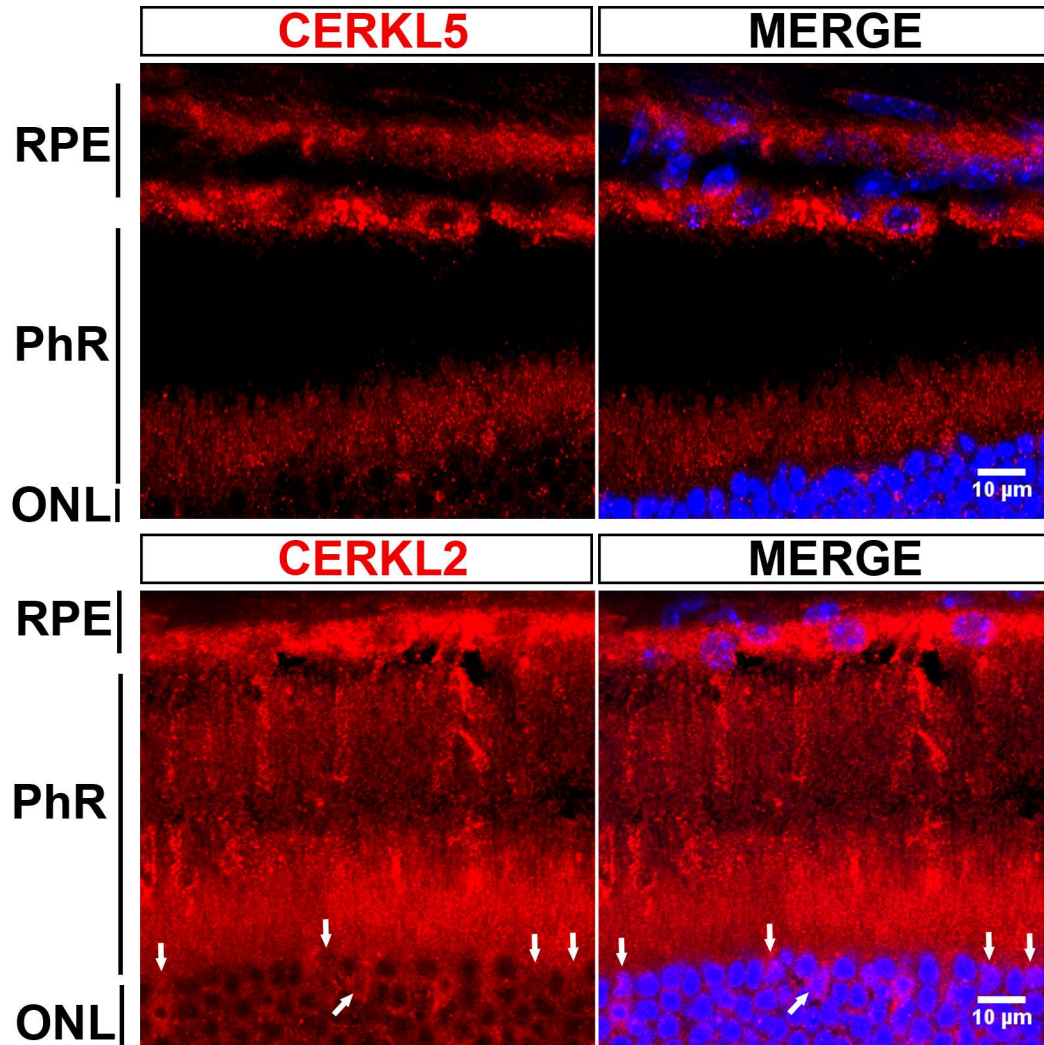

**Figure S3.** CERKL (in red) is highly expressed in the Retinal Pigment Epithelium (RPE) cells, as detected using two anti-CERKL antibodies recognizing different protein isoforms. Nuclei are counterstained with DAPI (blue). Note that some CERKL isoforms (detected with anti-CERKL2) are also localized in the nuclei of RPE cells and some cones (white arrows) (see main text). **PhR**- Photoreceptor layer (include the outer and inner segments of photoreceptors). **ONL**- Outer nuclear layer.

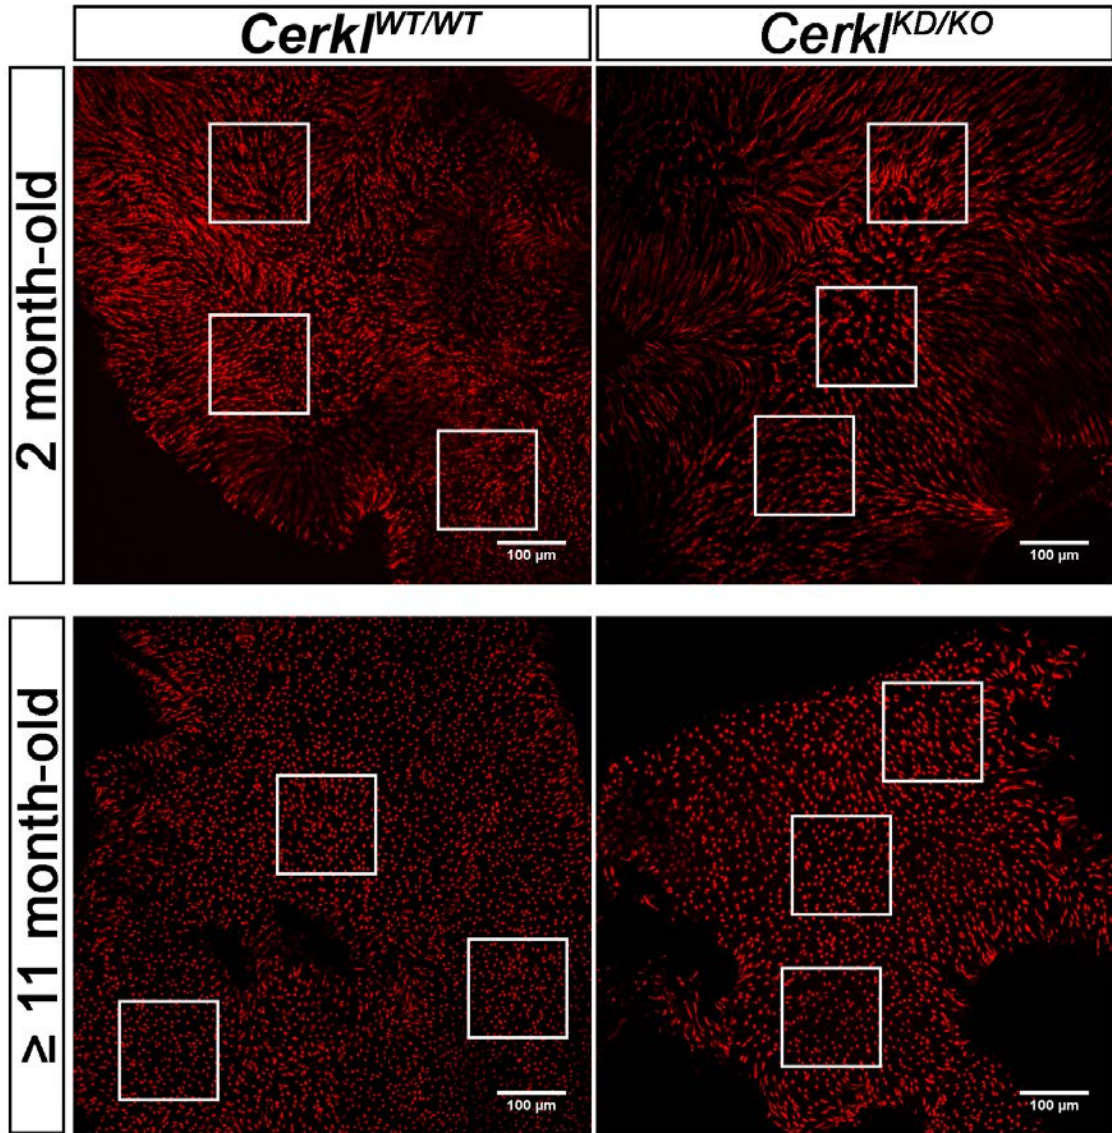

**Figure S4. Representative positioning of the ROIs (regions of interest) in a retinal whole mount.** The number of cones were counted on three ROIs per image and a minimum of 12 images per retina.

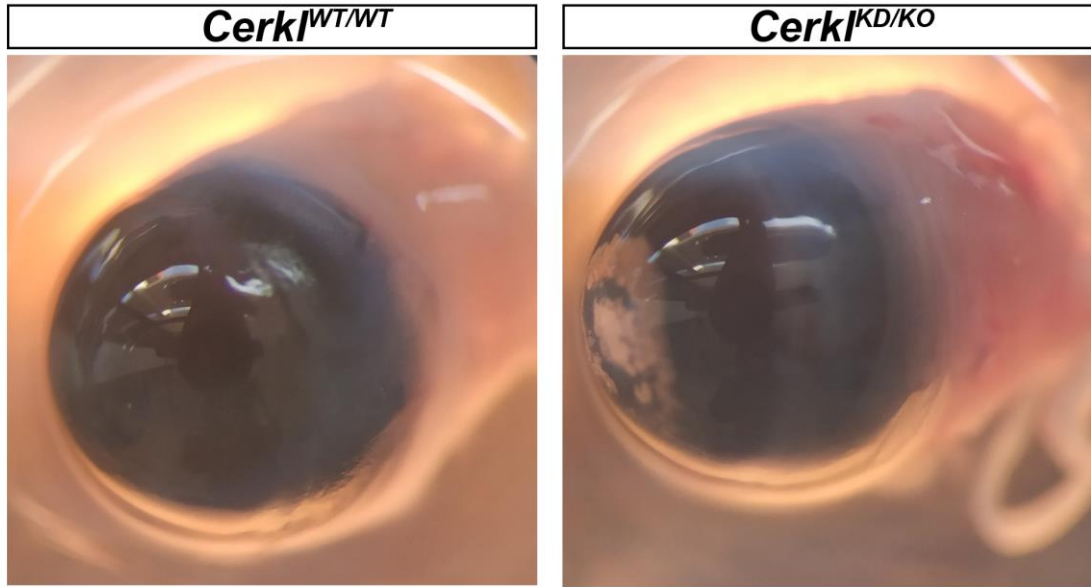

**Figure S5.** Corneal aggregates in aged *Cerkl*<sup>KD/KO</sup> mice ( $\geq 18$  months of age).

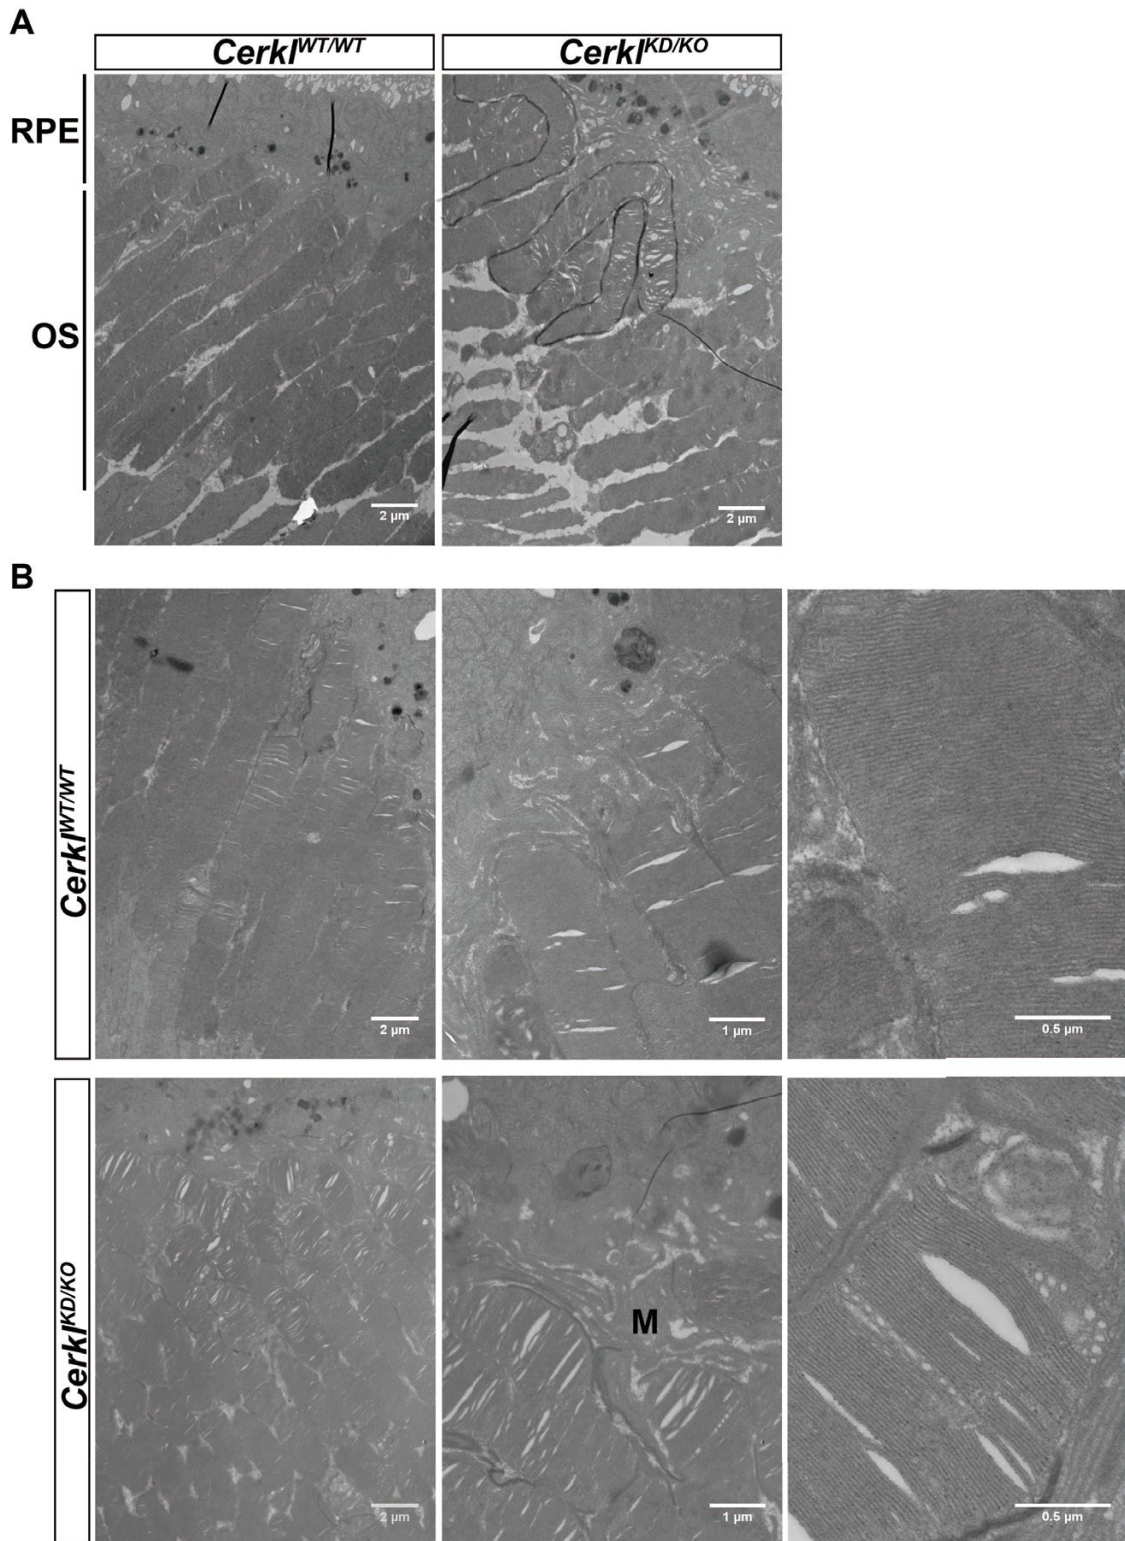

**Figure S6. Transmission electron microscopy image showing the ultrastructure of retinal photoreceptors.** A) *Cerkl<sup>KD/KO</sup>* photoreceptors show loose stacking of the membrane disks and disarrayed bent outer segments (outlined in black) and disorganized microvilli (M). B) Additional images from different *Cerkl<sup>KD/KO</sup>* and *Cerkl<sup>WT/WT</sup>* mice to show the consistency of the phenotype. Magnifications were taken at 5000x, 12000x and 40000x. Scale bars 2  $\mu\text{m}$ , 1  $\mu\text{m}$  and 0.5  $\mu\text{m}$  respectively.
